# Supplementary material for: Changes in H3K27ac at Gene Regulatory Regions in Porcine Alveolar Macrophages Following LPS or PolyIC Exposure
Source: Front Genet. 2020 Aug 20;11:817. doi: 10.3389/fgene.2020.00817 (PMC7468443; doi:10.3389/fgene.2020.00817)
Supplement: Supplementary file 13 [file Data_Sheet_6.xlsx]

## Sheet: Duplication rates stats
Supplementary file S6. Duplication rates of ChIP-seq of alveolar macrophages stimulated with LPS and Poly(I:C).
SAMPLE	UNPAIRED_READS_EXAMINED	READ_PAIRS_EXAMINED	SECONDARY_OR_SUPPLEMENTARY_RDS	UNMAPPED_READS	UNPAIRED_READ_DUPLICATES	READ_PAIR_DUPLICATES	READ_PAIR_OPTICAL_DUPLICATES	PERCENT_DUPLICATION	ESTIMATED_LIBRARY_SIZE
H3K27ac-P7C2H	466841	42004853	380582	4164169	388479	31309990	4537332	0.745869	11070045
H3K27ac-P7C6H	367049	42595745	418608	1861811	119124	5236840	1751897	0.123808	225529232
H3K27ac-P7LPS2H	437664	44663985	393758	4645212	348287	32453214	4771955	0.726945	12773018
H3K27ac-P7LPS6H	242078	25171988	246288	1475266	76316	3192413	960424	0.127726	123116794
H3K27ac-P7POL2H	713323	71622754	617597	7614327	632628	62413530	9649082	0.871497	9220332
H3K27ac-P7POL6H	513526	31437714	307093	3695532	365456	20920213	2938806	0.665824	11475049
H3K27ac-P8C2H	281805	23885644	217021	1734113	89147	3720876	793827	0.15672	83215058
H3K27ac-P8C6H	597829	64568168	549575	7430023	535183	56589647	8975723	0.876519	7986091
H3K27ac-P8LPS2H	664379	50493772	445998	6053643	502934	35770786	4991205	0.708737	15558186
H3K27ac-P8LPS6H	237247	21038940	177129	5561369	186294	15739573	920053	0.748324	5433311
H3K27ac-P8POL2H	335311	30576962	298278	2367645	106595	4498281	1237900	0.148045	122033708
H3K27ac-P8POL6H	461476	44185222	418352	4773752	188550	9179464	1760436	0.208793	106703065
H3K4me1-P7C2H	291030	24026120	231559	1458052	157395	8892153	1053418	0.371131	25466094
H3K4me1-P7C6H	284735	21457530	218396	967553	127705	6494675	667889	0.303637	29774708
H3K4me1-P7LPS2H	307563	23705564	229915	1132709	155257	7853828	969980	0.332426	29506055
H3K4me1-P7LPS6H	339511	33477764	329850	1847471	240103	18097310	2836182	0.541418	19354196
H3K4me1-P7POL2H	310987	24290732	242142	1261507	164556	8163088	821530	0.337286	29195190
H3K4me1-P7POL6H	322656	18094458	188667	1030840	155767	5519650	582808	0.306617	24895554
H3K4me1-P8C2H	246176	13810687	148249	759618	88855	3546215	386512	0.257693	23840184
H3K4me1-P8C6H	242711	17151800	186495	1022375	90483	4260155	533081	0.249254	31274910
H3K4me1-P8LPS2H	480672	30134223	312491	1330746	211282	8544881	1026181	0.284795	46154510
H3K4me1-P8LPS6H	807015	37886131	405803	7447173	523044	22210937	4291186	0.586907	18844280
H3K4me1-P8POL2H	421314	31464027	318938	1594172	220163	11812931	1020890	0.376421	32041186
H3K4me1-P8POL6H	495933	40581748	431904	2563369	348623	24372207	4383123	0.601193	19064628
I-P7C2H	656190	101814634	1215153	1210780	186697	8572492	3595135	0.084841	936071556
I-P7C6H	670190	82807584	969841	1204830	174045	7216556	3000040	0.087844	728429712
I-P7LPS2H	638386	111577546	1304239	1424686	177758	7791367	4180327	0.070424	1561065988
I-P7LPS6H	998447	122797422	1458728	1703399	313939	12521031	4390285	0.102825	822236796
I-P7POL2H	744479	112420285	1385309	1377225	212352	8321308	3907955	0.074717	1297589894
I-P7POL6H	780678	106645149	1215158	1365360	221174	9831205	3445920	0.092883	799188319
I-P8C2H	754656	105841531	1211619	1381512	232722	12757239	3970467	0.121199	556061486
I-P8C6H	647977	97783363	1121541	1383579	203885	10845392	4136906	0.111585	622021161
I-P8LPS2H	994838	136723499	1529553	1852574	310820	15338257	5930514	0.11291	865046133
I-P8LPS6H	593609	86198969	1062065	1280861	190622	9561359	3433687	0.111643	531004340
I-P8POL2H	660323	99910268	1176144	1314639	196548	9563329	3616100	0.096384	747130540
I-P8POL6H	566982	89619044	1032616	1331332	189393	10660464	3325145	0.119631	478396066
H3K27me3-P10C2H	508335	54359775	398126	1102289	114025	4578375	2810067	0.084876	734105129
H3K27me3-P10C6H	766924	57324337	452616	1804376	168324	6416221	3034475	0.112643	417488188
H3K27me3-P10LPS2H	570615	56053451	419827	1327019	124563	5347736	2862649	0.096027	551376082
H3K27me3-P10LPS6H	741583	52569997	407176	1422037	145533	4924350	2724496	0.094391	547973033
H3K27me3-P10POL2H	538235	49103220	363528	1003745	109565	3949445	2447830	0.081103	709158093
H3K27me3-P10POL6H	542641	48114038	378726	1376959	112303	4601652	2538062	0.096265	487980791
H3K27me3-P11C2H	529518	56892068	402802	1110686	124125	4654227	2854988	0.082515	793341714
H3K27me3-P11C6H	515740	45118961	334162	1246002	100810	3262795	1895237	0.073015	668590155
H3K27me3-P11LPS2H	643793	49830389	370720	1977311	147389	4244568	2625069	0.086103	672145947
H3K27me3-P11LPS6H	690303	56513811	447022	1423939	136936	4457884	2292266	0.079607	660587724
H3K27me3-P11POL2H	431374	48673119	352599	1294136	103077	3525346	2071777	0.073164	731402321
H3K27me3-P11POL6H	496020	54171284	389354	1191484	111541	3882240	2380737	0.072364	875843693
H3K4me3-P10C2H	283182	24527140	180476	804838	133444	1729787	1034710	0.072825	389132204
H3K4me3-P10C6H	698845	51011497	390524	4510711	366550	5850163	2168212	0.117471	307473403
H3K4me3-P10LPS2H	532011	50467175	366906	3354599	311480	7029299	2137494	0.141624	222344541
H3K4me3-P10LPS6H	635020	53219498	392230	2590122	362064	5726220	2356726	0.11034	366740362
H3K4me3-P10POL2H	556087	44581637	327682	3523451	307097	7108356	1801136	0.16188	157846483
H3K4me3-P10POL6H	548941	47564659	357695	2737029	318849	7257134	2122410	0.155031	185630410
H3K4me3-P11C2H	616759	53551940	401433	1575271	382663	4865806	2320297	0.093894	498328850
H3K4me3-P11C6H	715720	51012392	396222	4305118	405204	8982593	2334136	0.178804	161579627
H3K4me3-P11LPS2H	577936	41842509	306782	1574178	329781	3881590	1918296	0.096044	392515735
H3K4me3-P11LPS6H	595308	43554441	340218	3412962	327881	6542869	1890491	0.152942	172395775
H3K4me3-P11POL2H	482937	47497999	351091	1385531	290023	4252651	2185103	0.092118	481322301
H3K4me3-P11POL6H	689568	58226904	437990	4137110	409540	7786900	2739619	0.136443	286209086
I-P10C2H	252716	72474171	511219	748308	85796	5056561	2895124	0.07024	1096598102
I-P10C6H	209230	47407643	352724	569770	56470	3182943	1955116	0.067586	826076075
I-P10LPS2H	208424	57929103	407087	621546	65476	3964907	2301463	0.068885	911492332
I-P10LPS6H	300262	68074430	487331	854290	90331	4801668	2754822	0.071042	1020361314
I-P10POL2H	198458	41396985	317113	481918	48460	2610192	1603310	0.063486	773035314
I-P10POL6H	216290	53966393	395501	694534	69186	3600835	2231823	0.06723	960195259
I-P11C2H	240641	70003939	473499	910269	98559	4351473	2668502	0.062756	1324500850
I-P11C6H	353273	59351187	481138	847697	105018	4125377	2594346	0.070184	1033011005
I-P11LPS2H	288987	63420852	446103	2734511	99794	4234822	2590605	0.067407	1104883177
I-P11LPS6H	370448	64926445	535746	938150	107793	4759468	2769888	0.073925	950086563
I-P11POL2H	270928	64209222	512988	725764	99079	4397827	2802481	0.069118	1161249992
I-P11POL6H	329345	69068007	556955	887611	110032	4958671	3107540	0.072418	1153077680

## Sheet: Mapping stats
Supplementary file S6. ChIP-seq reads - mapping stats of alveolar macrophages stimulated with LPS and Poly(I:C).
SAMPLE	CATEGORY	TOTAL_READS	PF_READS	PCT_PF_READS	PF_NOISE_READS	PF_READS_ALIGNED	PCT_PF_READS_ALIGNED	PF_ALIGNED_BASES	PF_HQ_ALIGNED_READS	PF_HQ_ALIGNED_BASES	PF_HQ_ALIGNED_Q20_BASES	PF_HQ_MEDIAN_MISMATCHES	PF_MISMATCH_RATE	PF_HQ_ERROR_RATE	PF_INDEL_RATE	MEAN_READ_LENGTH	READS_ALIGNED_IN_PAIRS	PCT_READS_ALIGNED_IN_PAIRS	PF_READS_IMPROPER_PAIRS	PCT_PF_READS_IMPROPER_PAIRS	BAD_CYCLES	STRAND_BALANCE	PCT_CHIMERAS	PCT_ADAPTER
H3K27ac-P7C2H	FIRST_OF_PAIR	12676106	12676106	1	0	10754860	0.848436	1053082753	9894117	980138817	971113778	0	0.004634	0.003589	0.000631	99.941	10694863	0.994421	648436	0.060292	0	0.499714	0.044082	6e-06
H3K27ac-P7C2H	SECOND_OF_PAIR	12956151	12956151	1	0	10713228	0.826884	1040418844	9813167	968742936	950836251	0	0.005962	0.00477	0.000616	99.8429	10694863	0.998286	606804	0.056641	0	0.499359	0.04482	1.6e-05
H3K27ac-P7C2H	PAIR	25632257	25632257	1	0	21468088	0.837542	2093501597	19707284	1948881753	1921950029	0	0.005294	0.004176	0.000623	99.8914	21389726	0.99635	1255240	0.05847	0	0.499537	0.04445	1.1e-05
H3K27ac-P7C6H	FIRST_OF_PAIR	38371228	38371228	1	0	37583341	0.979467	3714577757	35972010	3570828129	3507686736	0	0.004558	0.003975	0.000613	99.9738	37358905	0.994028	1438094	0.038264	0	0.4999	0.02803	1e-06
H3K27ac-P7C6H	SECOND_OF_PAIR	38456318	38456318	1	0	37382394	0.972074	3671568662	35740053	3529668726	3393988869	0	0.007616	0.006991	0.000598	99.9477	37358905	0.999372	1237147	0.033094	0	0.499751	0.028542	3e-06
H3K27ac-P7C6H	PAIR	76827546	76827546	1	0	74965735	0.975766	7386146419	71712063	7100496855	6901675605	0	0.006078	0.005474	0.000606	99.9608	74717810	0.996693	2675241	0.035686	0	0.499826	0.028285	2e-06
H3K27ac-P7LPS2H	FIRST_OF_PAIR	14443482	14443482	1	0	12285674	0.850603	1205230301	11359350	1125783605	1115806300	0	0.004534	0.00356	0.000642	99.9572	12210771	0.993903	748890	0.060956	0	0.499533	0.040434	1.6e-05
H3K27ac-P7LPS2H	SECOND_OF_PAIR	14712649	14712649	1	0	12225245	0.830934	1190387532	11265806	1112572757	1090973662	0	0.00603	0.004913	0.000617	99.8517	12210771	0.998816	688461	0.056315	0	0.499472	0.041068	2.2e-05
H3K27ac-P7LPS2H	PAIR	29156131	29156131	1	0	24510919	0.840678	2395617833	22625156	2238356362	2206779962	0	0.005278	0.004232	0.00063	99.9039	24421542	0.996354	1437351	0.058641	0	0.499503	0.04075	1.9e-05
H3K27ac-P7LPS6H	FIRST_OF_PAIR	22771571	22771571	1	0	22127901	0.971734	2186932380	21250974	2109364658	2070683629	0	0.004509	0.003972	0.000613	99.9742	21979575	0.993297	811640	0.036679	0	0.499683	0.027555	2e-06
H3K27ac-P7LPS6H	SECOND_OF_PAIR	22828607	22828607	1	0	21997011	0.963572	2159378085	21100078	2082959450	1996397064	0	0.007845	0.007265	0.000596	99.9478	21979575	0.999207	680750	0.030947	0	0.499954	0.028022	4e-06
H3K27ac-P7LPS6H	PAIR	45600178	45600178	1	0	44124912	0.967648	4346310465	42351052	4192324108	4067080693	0	0.006166	0.005608	0.000605	99.961	43959150	0.996243	1492390	0.033822	0	0.499818	0.027788	3e-06
H3K27ac-P7POL2H	FIRST_OF_PAIR	12838874	12838874	1	0	9267833	0.721857	899626407	8215949	812195469	805362443	0	0.005084	0.003681	0.000676	99.9157	9209224	0.993676	858601	0.092643	0	0.49922	0.071047	1.2e-05
H3K27ac-P7POL2H	SECOND_OF_PAIR	13274596	13274596	1	0	9231310	0.695412	884495182	8105490	797298905	781102744	0	0.006757	0.005079	0.000654	99.8227	9209224	0.997607	822078	0.089053	0	0.498842	0.072024	2.1e-05
H3K27ac-P7POL2H	PAIR	26113470	26113470	1	0	18499143	0.708414	1784121589	16321439	1609494374	1586465187	0	0.005914	0.004374	0.000665	99.8684	18418448	0.995638	1680679	0.090852	0	0.499031	0.071535	1.6e-05
H3K27ac-P7POL6H	FIRST_OF_PAIR	12317491	12317491	1	0	10632952	0.86324	1038461344	9775036	967350165	956622715	0	0.004928	0.003853	0.000647	99.9447	10517501	0.989142	692936	0.065169	0	0.499491	0.04004	3e-06
H3K27ac-P7POL6H	SECOND_OF_PAIR	12561113	12561113	1	0	10550120	0.839903	1020807163	9662716	951656532	927254668	0	0.006961	0.005761	0.000624	99.8519	10517501	0.996908	610104	0.057829	0	0.499689	0.041006	1.1e-05
H3K27ac-P7POL6H	PAIR	24878604	24878604	1	0	21183072	0.851457	2059268507	19437752	1919006697	1883877383	0	0.005936	0.004799	0.000636	99.8978	21035002	0.99301	1303040	0.061513	0	0.49959	0.040522	7e-06
H3K27ac-P8C2H	FIRST_OF_PAIR	21092901	21092901	1	0	20341069	0.964356	2011315456	19609214	1946800611	1913351045	0	0.004328	0.003856	0.00059	99.9734	20164768	0.991333	859106	0.042235	0	0.499827	0.024172	7e-06
H3K27ac-P8C2H	SECOND_OF_PAIR	21163406	21163406	1	0	20181125	0.953586	1982430399	19422227	1918219120	1846529981	0	0.007309	0.006788	0.000579	99.9495	20164768	0.999189	699162	0.034644	0	0.499858	0.024738	1.4e-05
H3K27ac-P8C2H	PAIR	42256307	42256307	1	0	40522194	0.958962	3993745855	39031441	3865019731	3759881026	0	0.005808	0.005311	0.000585	99.9614	40329536	0.995246	1558268	0.038455	0	0.499843	0.024454	1e-05
H3K27ac-P8C6H	FIRST_OF_PAIR	11532926	11532926	1	0	8027383	0.69604	782159750	7200217	712607622	706560755	0	0.004815	0.003564	0.000647	99.9098	7978521	0.993913	763759	0.095144	0	0.49936	0.072918	0.000153
H3K27ac-P8C6H	SECOND_OF_PAIR	11916785	11916785	1	0	7992305	0.670676	769539740	7114643	700764359	687861977	0	0.006305	0.004794	0.000629	99.7742	7978521	0.998275	728681	0.091173	0	0.498504	0.073995	8.7e-05
H3K27ac-P8C6H	PAIR	23449711	23449711	1	0	16019688	0.683151	1551699490	14314860	1413371981	1394422732	0	0.005554	0.004174	0.000638	99.8409	15957042	0.996089	1492440	0.093163	0	0.498933	0.073455	0.00012
H3K27ac-P8LPS2H	FIRST_OF_PAIR	17678787	17678787	1	0	14842674	0.839575	1450765982	13873633	1372820366	1360043569	0	0.004343	0.003573	0.00063	99.9498	14722986	0.991936	879177	0.059233	0	0.499813	0.037252	9e-06
H3K27ac-P8LPS2H	SECOND_OF_PAIR	17982273	17982273	1	0	14764743	0.821072	1433646472	13766040	1357140357	1329283944	0	0.005924	0.005043	0.000606	99.8845	14722986	0.997172	801246	0.054268	0	0.499353	0.037892	2e-05
H3K27ac-P8LPS2H	PAIR	35661060	35661060	1	0	29607417	0.830245	2884412454	27639673	2729960723	2689327513	0	0.005129	0.004304	0.000618	99.9169	29445972	0.994547	1680423	0.056757	0	0.499584	0.037571	1.4e-05
H3K27ac-P8LPS6H	FIRST_OF_PAIR	8048515	8048515	1	0	5335377	0.662902	520711436	4918046	486342780	482109894	0	0.004602	0.003617	0.000643	99.9464	5299367	0.993251	303598	0.056903	0	0.499596	0.039782	0.000125
H3K27ac-P8LPS6H	SECOND_OF_PAIR	8162541	8162541	1	0	5314310	0.651061	515578161	4886763	481931735	474104595	0	0.005842	0.004722	0.000624	99.8994	5299367	0.997188	282531	0.053164	0	0.49951	0.040562	4.2e-05
H3K27ac-P8LPS6H	PAIR	16211056	16211056	1	0	10649687	0.65694	1036289597	9804809	968274515	956214489	0	0.005219	0.004167	0.000634	99.9227	10598734	0.995216	586129	0.055037	0	0.499553	0.040171	8.3e-05
H3K27ac-P8POL2H	FIRST_OF_PAIR	27338474	27338474	1	0	26284420	0.961444	2596431629	25299548	2510423745	2467246716	0	0.004367	0.003872	0.000615	99.9694	26078681	0.992173	1185272	0.045094	0	0.499655	0.029322	3e-06
H3K27ac-P8POL2H	SECOND_OF_PAIR	27415249	27415249	1	0	26101658	0.952085	2562135383	25092235	2477309815	2381662566	0	0.007453	0.006906	0.000599	99.9427	26078681	0.99912	1002510	0.038408	0	0.49999	0.029674	5e-06
H3K27ac-P8POL2H	PAIR	54753723	54753723	1	0	52386078	0.956758	5158567012	50391783	4987733560	4848909282	0	0.0059	0.005379	0.000607	99.956	52157362	0.995634	2187782	0.041763	0	0.499822	0.029497	4e-06
H3K27ac-P8POL6H	FIRST_OF_PAIR	37471099	37471099	1	0	35225631	0.940075	3472961136	33719265	3343689968	3289124298	0	0.004498	0.003914	0.000614	99.9733	35005758	0.993758	1425798	0.040476	0	0.499747	0.02781	4e-06
H3K27ac-P8POL6H	SECOND_OF_PAIR	37587095	37587095	1	0	35058811	0.932735	3437882289	33521546	3309945624	3196930197	0	0.007119	0.006493	0.000601	99.9475	35005758	0.998487	1258978	0.03591	0	0.499872	0.028273	7e-06
H3K27ac-P8POL6H	PAIR	75058194	75058194	1	0	70284442	0.936399	6910843425	67240811	6653635592	6486054495	0	0.005802	0.005197	0.000608	99.9604	70011516	0.996117	2684776	0.038199	0	0.499809	0.028041	5e-06
H3K4me1-P7C2H	FIRST_OF_PAIR	15868194	15868194	1	0	15252381	0.961192	1505351135	14759887	1464531212	1442460734	0	0.004097	0.003783	0.000612	99.9769	15133967	0.992236	572157	0.037513	0	0.49963	0.023245	1e-06
H3K4me1-P7C2H	SECOND_OF_PAIR	15991427	15991427	1	0	15149188	0.947332	1486807777	14650155	1447141896	1397583006	0	0.006855	0.006479	0.000592	99.9511	15133967	0.998995	468964	0.030956	0	0.49986	0.023706	4e-06
H3K4me1-P7C2H	PAIR	31859621	31859621	1	0	30401569	0.954235	2992158912	29410042	2911673108	2840043740	0	0.005468	0.005123	0.000602	99.9639	30267934	0.995604	1041121	0.034246	0	0.499744	0.023475	3e-06
H3K4me1-P7C6H	FIRST_OF_PAIR	15473535	15473535	1	0	15108103	0.976383	1491774100	14628874	1451695664	1426835051	0	0.004205	0.003886	0.000606	99.9796	14962855	0.990386	567195	0.037542	0	0.499689	0.022586	1e-06
H3K4me1-P7C6H	SECOND_OF_PAIR	15576758	15576758	1	0	14974637	0.961345	1467132924	14475616	1427749364	1367735837	0	0.007752	0.00737	0.000587	99.952	14962855	0.999213	433729	0.028964	0	0.499894	0.023187	4e-06
H3K4me1-P7C6H	PAIR	31050293	31050293	1	0	30082740	0.968839	2958907024	29104490	2879445028	2794570888	0	0.005963	0.005614	0.000597	99.9657	29925710	0.99478	1000924	0.033272	0	0.499791	0.022886	3e-06
H3K4me1-P7LPS2H	FIRST_OF_PAIR	16430327	16430327	1	0	15992122	0.97333	1579958826	15461513	1534829246	1510504080	0	0.004163	0.003807	0.000609	99.9777	15851736	0.991222	605570	0.037867	0	0.499568	0.022526	2e-06
H3K4me1-P7LPS2H	SECOND_OF_PAIR	16558160	16558160	1	0	15863656	0.958057	1556993454	15320205	1512954654	1455961342	0	0.007297	0.006876	0.00059	99.948	15851736	0.999249	477104	0.030075	0	0.49992	0.022995	5e-06
H3K4me1-P7LPS2H	PAIR	32988487	32988487	1	0	31855778	0.965664	3136952280	30781718	3047783900	2966465422	0	0.005719	0.00533	0.0006	99.9628	31703472	0.995219	1082674	0.033987	0	0.499744	0.02276	3e-06
H3K4me1-P7LPS6H	FIRST_OF_PAIR	16261544	16261544	1	0	15466676	0.95112	1524770374	14866189	1474738518	1455952928	0	0.004059	0.003705	0.000622	99.9783	15380454	0.994425	632623	0.040902	0	0.499712	0.029553	7e-06
H3K4me1-P7LPS6H	SECOND_OF_PAIR	16446243	16446243	1	0	15393640	0.935997	1508764491	14785314	1460429132	1416014248	0	0.006351	0.005922	0.000604	99.9327	15380454	0.999143	559587	0.036352	0	0.499548	0.03005	9e-06
H3K4me1-P7LPS6H	PAIR	32707787	32707787	1	0	30860316	0.943516	3033534865	29651503	2935167650	2871967176	0	0.005199	0.004808	0.000614	99.9554	30760908	0.996779	1192210	0.038632	0	0.49963	0.029801	8e-06
H3K4me1-P7POL2H	FIRST_OF_PAIR	16764904	16764904	1	0	16260117	0.96989	1606020262	15718883	1560117754	1535881204	0	0.004134	0.003788	0.000609	99.9826	16127644	0.991853	612870	0.037692	0	0.49955	0.023211	1e-05
H3K4me1-P7POL2H	SECOND_OF_PAIR	16898322	16898322	1	0	16141602	0.955219	1583573125	15579531	1538200284	1479225084	0	0.007322	0.006904	0.000592	99.9565	16127644	0.999135	494355	0.030626	0	0.499952	0.023903	9e-06
H3K4me1-P7POL2H	PAIR	33663226	33663226	1	0	32401719	0.962526	3189593387	31298414	3098318038	3015106288	0	0.005717	0.005335	0.0006	99.9695	32255288	0.995481	1107225	0.034172	0	0.49975	0.023556	9e-06
H3K4me1-P7POL6H	FIRST_OF_PAIR	13108584	13108584	1	0	12727237	0.970909	1256681476	12257748	1216584448	1195896949	0	0.004339	0.003912	0.000611	99.9815	12574808	0.988023	588414	0.046233	0	0.499907	0.02883	3e-06
H3K4me1-P7POL6H	SECOND_OF_PAIR	13238761	13238761	1	0	12589268	0.95094	1231131466	12095919	1191655964	1136966068	0	0.008424	0.007925	0.000594	99.9404	12574808	0.998851	450445	0.03578	0	0.499679	0.029717	6e-06
H3K4me1-P7POL6H	PAIR	26347345	26347345	1	0	25316505	0.960875	2487812942	24353667	2408240412	2332863017	0	0.006361	0.005897	0.000602	99.9608	25149616	0.993408	1038859	0.041035	0	0.499794	0.029271	5e-06
H3K4me1-P8C2H	FIRST_OF_PAIR	10685314	10685314	1	0	10412664	0.974484	1027853117	9991088	991435649	973305494	0	0.004506	0.003991	0.000607	99.9791	10264472	0.985768	515668	0.049523	0	0.499771	0.026332	2.9e-05
H3K4me1-P8C2H	SECOND_OF_PAIR	10760569	10760569	1	0	10273601	0.954745	1004255216	9831198	968491184	922683928	0	0.008663	0.008072	0.00059	99.9293	10264472	0.999111	376605	0.036658	0	0.499768	0.026974	1.7e-05
H3K4me1-P8C2H	PAIR	21445883	21445883	1	0	20686265	0.96458	2032108333	19822286	1959926833	1895989422	0	0.006561	0.006008	0.000599	99.9541	20528944	0.992395	892273	0.043134	0	0.499769	0.026651	2.3e-05
H3K4me1-P8C6H	FIRST_OF_PAIR	13443167	13443167	1	0	13030310	0.969289	1285643828	12560253	1245858597	1222849049	0	0.00443	0.004023	0.000606	99.9796	12891645	0.989358	566496	0.043475	0	0.499806	0.025167	9.9e-05
H3K4me1-P8C6H	SECOND_OF_PAIR	13514726	13514726	1	0	12905208	0.9549	1263622558	12414438	1224352926	1172109453	0	0.007906	0.007428	0.000587	99.9443	12891645	0.998949	441394	0.034203	0	0.499802	0.025727	4e-05
H3K4me1-P8C6H	PAIR	26957893	26957893	1	0	25935518	0.962075	2549266386	24974691	2470211523	2394958502	0	0.006153	0.005711	0.000597	99.9619	25783290	0.994131	1007890	0.038861	0	0.499804	0.025446	7e-05
H3K4me1-P8LPS2H	FIRST_OF_PAIR	22297744	22297744	1	0	21844386	0.979668	2158601259	21128529	2097303157	2061484637	0	0.004207	0.003843	0.000603	99.9752	21589342	0.988325	934381	0.042774	0	0.499852	0.024325	4e-06
H3K4me1-P8LPS2H	SECOND_OF_PAIR	22481076	22481076	1	0	21603688	0.960972	2116124860	20852699	2055598512	1960234837	0	0.008267	0.007826	0.000584	99.9502	21589342	0.999336	693683	0.032109	0	0.499777	0.02495	7e-06
H3K4me1-P8LPS2H	PAIR	44778820	44778820	1	0	43448074	0.970282	4274726119	41981228	4152901669	4021719474	0	0.006217	0.005815	0.000593	99.9626	43178684	0.9938	1628064	0.037471	0	0.499815	0.024636	5e-06
H3K4me1-P8LPS6H	FIRST_OF_PAIR	19412793	19412793	1	0	15877029	0.817864	1547042373	14944867	1476562319	1458842175	0	0.004556	0.003941	0.000645	99.976	15675194	0.987288	974426	0.061373	0	0.49953	0.036808	8e-06
H3K4me1-P8LPS6H	SECOND_OF_PAIR	19668739	19668739	1	0	15757330	0.801136	1524379963	14812380	1456391894	1411006764	0	0.007005	0.006295	0.000617	99.9151	15675194	0.994787	854727	0.054243	0	0.499674	0.037416	1.2e-05
H3K4me1-P8LPS6H	PAIR	39081532	39081532	1	0	31634359	0.809445	3071422336	29757247	2932954213	2869848939	0	0.005772	0.00511	0.000631	99.9454	31350388	0.991023	1829153	0.057822	0	0.499601	0.037111	1e-05
H3K4me1-P8POL2H	FIRST_OF_PAIR	20455046	20455046	1	0	19839607	0.969913	1958934077	19041098	1889857855	1861187768	0	0.004308	0.003833	0.000613	99.9729	19651096	0.990498	903506	0.045541	0	0.499849	0.026264	7e-06
H3K4me1-P8POL2H	SECOND_OF_PAIR	20642469	20642469	1	0	19663736	0.952586	1928518094	18844230	1860981597	1794010666	0	0.007302	0.00675	0.000591	99.9395	19651096	0.999357	727635	0.037004	0	0.499715	0.026875	6e-06
H3K4me1-P8POL2H	PAIR	41097515	41097515	1	0	39503343	0.96121	3887452171	37885328	3750839452	3655198434	0	0.005793	0.00528	0.000603	99.9561	39302192	0.994908	1631141	0.041291	0	0.499782	0.026568	6e-06
H3K4me1-P8POL6H	FIRST_OF_PAIR	17428215	17428215	1	0	16337431	0.937413	1606851505	15555574	1542187797	1523679495	0	0.00423	0.003755	0.000626	99.9676	16209541	0.992172	907071	0.055521	0	0.499438	0.035729	3e-06
H3K4me1-P8POL6H	SECOND_OF_PAIR	17701546	17701546	1	0	16228961	0.91681	1584684860	15421938	1521695247	1476584738	0	0.006563	0.005982	0.000604	99.917	16209541	0.998803	798601	0.049208	0	0.49976	0.036443	9e-06
H3K4me1-P8POL6H	PAIR	35129761	35129761	1	0	32566392	0.927031	3191536365	30977512	3063883044	3000264233	0	0.005389	0.004861	0.000615	99.9421	32419082	0.995477	1705672	0.052375	0	0.499599	0.036085	6e-06
I-P7C2H	FIRST_OF_PAIR	94030383	94030383	1	0	93676610	0.996238	9243963789	87519617	8683459040	8531621456	0	0.005306	0.004328	0.000682	99.9822	93242142	0.995362	3860561	0.041212	0	0.499888	0.0296	1e-06
I-P7C2H	SECOND_OF_PAIR	94134174	94134174	1	0	93277167	0.990896	9156746214	87023811	8600916352	8322215983	0	0.007624	0.006604	0.000668	99.9506	93242142	0.999625	3461118	0.037106	0	0.499784	0.03025	1e-06
I-P7C2H	PAIR	188164557	188164557	1	0	186953777	0.993565	18400710003	174543428	17284375392	16853837439	0	0.00646	0.005461	0.000675	99.9664	186484284	0.997489	7321679	0.039163	0	0.499836	0.029925	1e-06
I-P7C6H	FIRST_OF_PAIR	76389079	76389079	1	0	76054319	0.995618	7504888312	70943628	7039848242	6915639600	0	0.005387	0.004352	0.000679	99.9749	75591028	0.993908	3147252	0.041382	0	0.500008	0.030355	0
I-P7C6H	SECOND_OF_PAIR	76493952	76493952	1	0	75623882	0.988626	7413887330	70425508	6954673913	6699648928	0	0.008204	0.00713	0.000663	99.9457	75591028	0.999566	2716815	0.035925	0	0.49965	0.031071	1e-06
I-P7C6H	PAIR	152883031	152883031	1	0	151678201	0.992119	14918775642	141369136	13994522155	13615288528	0	0.006787	0.005733	0.000671	99.9603	151182056	0.996729	5864067	0.038661	0	0.499829	0.030712	1e-06
I-P7LPS2H	FIRST_OF_PAIR	104686265	104686265	1	0	104204332	0.995396	10283168849	97420773	9665738599	9501026998	0	0.005269	0.004299	0.000685	99.974	103786179	0.995987	4135778	0.039689	0	0.499865	0.028653	0
I-P7LPS2H	SECOND_OF_PAIR	104771407	104771407	1	0	103828654	0.991002	10199356535	96959562	9586643897	9289369839	0	0.007421	0.006411	0.000669	99.9547	103786179	0.999591	3760100	0.036214	0	0.499792	0.029257	1e-06
I-P7LPS2H	PAIR	209457672	209457672	1	0	208032986	0.993198	20482525384	194380335	19252382496	18790396837	0	0.00634	0.005351	0.000677	99.9643	207572358	0.997786	7895878	0.037955	0	0.499829	0.028955	1e-06
I-P7LPS6H	FIRST_OF_PAIR	111376577	111376577	1	0	110906597	0.99578	10939502584	102996170	10218955401	10038144771	0	0.005474	0.004384	0.000683	99.9828	110276391	0.994318	6748407	0.060848	0	0.49984	0.050771	2e-06
I-P7LPS6H	SECOND_OF_PAIR	111564112	111564112	1	0	110330693	0.988944	10821777602	102292745	10107949051	9747031035	0	0.008064	0.006923	0.000666	99.9534	110276391	0.999508	6172503	0.055945	0	0.499797	0.051433	2e-06
I-P7LPS6H	PAIR	222940689	222940689	1	0	221237290	0.992359	21761280186	205288915	20326904452	19785175806	0	0.006762	0.005646	0.000675	99.9681	220552782	0.996906	12920910	0.058403	0	0.499819	0.051101	2e-06
I-P7POL2H	FIRST_OF_PAIR	104994601	104994601	1	0	104593548	0.99618	10318319290	97573117	9679243545	9509117289	0	0.005386	0.004376	0.00069	99.9745	104098977	0.995271	4284766	0.040966	0	0.499771	0.029487	0
I-P7POL2H	SECOND_OF_PAIR	105112705	105112705	1	0	104136533	0.990713	10216686081	96985098	9581294798	9236706520	0	0.007993	0.006932	0.000672	99.9588	104098977	0.999639	3827751	0.036757	0	0.499861	0.030147	1e-06
I-P7POL2H	PAIR	210107306	210107306	1	0	208730081	0.993445	20535005371	194558215	19260538343	18745823809	0	0.006683	0.005647	0.000681	99.9667	208197954	0.997451	8112517	0.038866	0	0.499816	0.029816	1e-06
I-P7POL6H	FIRST_OF_PAIR	97711890	97711890	1	0	97333204	0.996124	9607069280	90866926	9017703662	8855364948	0	0.005343	0.004337	0.000677	99.9771	96813944	0.994665	4559352	0.046843	0	0.499829	0.035417	1e-06
I-P7POL6H	SECOND_OF_PAIR	97840862	97840862	1	0	96854188	0.989916	9505520115	90268743	8921527235	8611826139	0	0.007863	0.006813	0.000662	99.9518	96813944	0.999584	4080336	0.042129	0	0.499812	0.036006	2e-06
I-P7POL6H	PAIR	195552752	195552752	1	0	194187392	0.993018	19112589395	181135669	17939230897	17467191087	0	0.006596	0.005568	0.000669	99.9644	193627888	0.997119	8639688	0.044491	0	0.499821	0.035711	1e-06
I-P8C2H	FIRST_OF_PAIR	93960852	93960852	1	0	93567517	0.995814	9236755356	87509447	8684741793	8538213484	0	0.005415	0.004412	0.000683	99.9767	93084292	0.994836	4217065	0.04507	0	0.499875	0.032524	0
I-P8C2H	SECOND_OF_PAIR	94111178	94111178	1	0	93123001	0.9895	9144908591	86971539	8597249495	8314718401	0	0.007836	0.00679	0.000667	99.9566	93084292	0.999584	3772549	0.040511	0	0.499828	0.03321	1e-06
I-P8C2H	PAIR	188072030	188072030	1	0	186690518	0.992654	18381663947	174480986	17281991288	16852931885	0	0.006619	0.005595	0.000675	99.9667	186168584	0.997204	7989614	0.042796	0	0.499852	0.032866	1e-06
I-P8C6H	FIRST_OF_PAIR	87795204	87795204	1	0	87331619	0.99472	8613065124	81090568	8044418173	7909332894	0	0.005556	0.004437	0.000692	99.9829	86937971	0.995492	5521394	0.063223	0	0.499759	0.052315	1e-06
I-P8C6H	SECOND_OF_PAIR	87908409	87908409	1	0	86988415	0.989535	8544469863	80691602	7980430569	7740200362	0	0.007611	0.006449	0.000678	99.9581	86937971	0.99942	5178190	0.059527	0	0.499906	0.052902	1e-06
I-P8C6H	PAIR	175703613	175703613	1	0	174320034	0.992125	17157534987	161782170	16024848742	15649533256	0	0.00658	0.005439	0.000685	99.9705	173875942	0.997452	10699584	0.061379	0	0.499833	0.052608	1e-06
I-P8LPS2H	FIRST_OF_PAIR	122561873	122561873	1	0	122017901	0.995562	12042103545	113817471	11294715560	11103139110	0	0.005434	0.004393	0.00068	99.9736	121385242	0.994815	5930258	0.048602	0	0.499943	0.035584	1.5e-05
I-P8LPS2H	SECOND_OF_PAIR	122745203	122745203	1	0	121436601	0.989339	11924977305	113131368	11184312822	10818877705	0	0.007814	0.006732	0.000663	99.9512	121385242	0.999577	5348958	0.044047	0	0.49977	0.036179	4e-06
I-P8LPS2H	PAIR	245307076	245307076	1	0	243454502	0.992448	23967080850	226948839	22479028382	21922016815	0	0.006618	0.005557	0.000672	99.9624	242770484	0.99719	11279216	0.04633	0	0.499856	0.035881	1e-05
I-P8LPS6H	FIRST_OF_PAIR	77421320	77421320	1	0	77004857	0.994621	7590078994	71401797	7080994676	6960288081	0	0.005683	0.004505	0.000705	99.983	76637610	0.995231	3258924	0.042321	0	0.499759	0.03305	1e-06
I-P8LPS6H	SECOND_OF_PAIR	77537748	77537748	1	0	76673350	0.988852	7519660326	71012919	7016131126	6787054740	0	0.008026	0.006806	0.000689	99.9523	76637610	0.999534	2927417	0.03818	0	0.499868	0.033681	2e-06
I-P8LPS6H	PAIR	154959068	154959068	1	0	153678207	0.991734	15109739320	142414716	14097125802	13747342821	0	0.006849	0.00565	0.000697	99.9677	153275220	0.997378	6186341	0.040255	0	0.499813	0.033365	1e-06
I-P8POL2H	FIRST_OF_PAIR	91179200	91179200	1	0	90769309	0.995505	8954675760	84597391	8392500317	8248599543	0	0.005461	0.004414	0.000689	99.9734	90346939	0.995347	4787108	0.052739	0	0.499812	0.040787	1e-06
I-P8POL2H	SECOND_OF_PAIR	91293092	91293092	1	0	90388344	0.99009	8876602149	84141538	8318369194	8058207194	0	0.00764	0.00655	0.000674	99.9572	90346939	0.999542	4406143	0.048747	0	0.499855	0.041462	1e-06
I-P8POL2H	PAIR	182472292	182472292	1	0	181157653	0.992795	17831277909	168738929	16710869511	16306806737	0	0.006546	0.005477	0.000682	99.9653	180693878	0.99744	9193251	0.050747	0	0.499834	0.041124	1e-06
I-P8POL6H	FIRST_OF_PAIR	79758507	79758507	1	0	79303230	0.994292	7822320766	73747024	7316668810	7194083655	0	0.005556	0.004442	0.000688	99.976	78958580	0.995654	2807546	0.035403	0	0.499928	0.024507	0
I-P8POL6H	SECOND_OF_PAIR	79867574	79867574	1	0	78991519	0.989031	7754293165	73379134	7253798801	7024471122	0	0.007813	0.006663	0.000674	99.9537	78958580	0.999583	2495835	0.031596	0	0.499761	0.025152	1e-06
I-P8POL6H	PAIR	159626081	159626081	1	0	158294749	0.99166	15576613931	147126158	14570467611	14218554777	0	0.006679	0.005547	0.000681	99.9648	157917160	0.997615	5303381	0.033503	0	0.499845	0.024829	1e-06
H3K27me3-P10C2H	FIRST_OF_PAIR	55165087	55165087	1	0	54829688	0.99392	5394567475	52342595	5169322957	5090355495	0	0.004437	0.004098	0.000602	100	54359775	0.99143	1379895	0.025167	0	0.499909	0.012803	0.000934
H3K27me3-P10C2H	SECOND_OF_PAIR	55165087	55165087	1	0	54398197	0.986098	5302305149	51859858	5079519430	4832629473	0	0.008678	0.008301	0.000581	100	54359775	0.999294	948404	0.017434	0	0.499964	0.013328	0.000918
H3K27me3-P10C2H	PAIR	110330174	110330174	1	0	109227885	0.990009	10696872624	104202453	10248842387	9922984968	0	0.006539	0.006181	0.000592	100	108719550	0.995346	2328299	0.021316	0	0.499936	0.013065	0.000926
H3K27me3-P10C6H	FIRST_OF_PAIR	58609987	58609987	1	0	58044314	0.990349	5706276724	55333104	5467112062	5380680613	0	0.004502	0.004153	0.000613	100	57324337	0.987596	1796596	0.030952	0	0.499963	0.013493	0.001052
H3K27me3-P10C6H	SECOND_OF_PAIR	58609987	58609987	1	0	57371284	0.978865	5576140490	54581502	5339321707	5051417625	0	0.00942	0.009029	0.000588	100	57324337	0.999182	1123566	0.019584	0	0.499914	0.01422	0.001033
H3K27me3-P10C6H	PAIR	117219974	117219974	1	0	115415598	0.984607	11282417214	109914606	10806433769	10432098238	0	0.006932	0.006562	0.000601	100	114648674	0.993355	2920162	0.025301	0	0.499939	0.013854	0.001043
H3K27me3-P10LPS2H	FIRST_OF_PAIR	57002268	57002268	1	0	56581634	0.992621	5550096592	53858649	5306869064	5226160250	0	0.00451	0.00412	0.000609	100	56053451	0.990665	1601435	0.028303	0	0.499853	0.012831	0.001691
H3K27me3-P10LPS2H	SECOND_OF_PAIR	57002268	57002268	1	0	56095883	0.984099	5450645560	53312519	5209679444	4956596688	0	0.008773	0.008351	0.000585	100	56053451	0.999244	1115684	0.019889	0	0.499993	0.013425	0.001662
H3K27me3-P10LPS2H	PAIR	114004536	114004536	1	0	112677517	0.98836	11000742152	107171168	10516548508	10182756938	0	0.006622	0.006216	0.000597	100	112106902	0.994936	2717119	0.024114	0	0.499923	0.013127	0.001677
H3K27me3-P10LPS6H	FIRST_OF_PAIR	53651807	53651807	1	0	53271890	0.992919	5250132270	50842684	5032390587	4953055802	0	0.004481	0.004116	0.000611	100	52569997	0.986824	1636729	0.030724	0	0.500113	0.01361	0.000753
H3K27me3-P10LPS6H	SECOND_OF_PAIR	53651807	53651807	1	0	52609687	0.980576	5122432215	50114448	4907711578	4629594105	0	0.009774	0.009364	0.000583	100	52569997	0.999246	974526	0.018524	0	0.499753	0.014299	0.000756
H3K27me3-P10LPS6H	PAIR	107303614	107303614	1	0	105881577	0.986748	10372564485	100957132	9940102165	9582649907	0	0.007095	0.006707	0.000597	100	105139994	0.992996	2611255	0.024662	0	0.499934	0.013953	0.000754
H3K27me3-P10POL2H	FIRST_OF_PAIR	49874210	49874210	1	0	49607230	0.994647	4889373036	47387876	4687265363	4614357383	0	0.004446	0.004101	0.000603	100	49103220	0.98984	1325397	0.026718	0	0.499866	0.013001	0.000869
H3K27me3-P10POL2H	SECOND_OF_PAIR	49874210	49874210	1	0	49137445	0.985228	4792860908	46865237	4593208357	4352857227	0	0.009145	0.008758	0.00058	100	49103220	0.999303	855612	0.017413	0	0.500011	0.01359	0.000859
H3K27me3-P10POL2H	PAIR	99748420	99748420	1	0	98744675	0.989937	9682233944	94253113	9280473720	8967214610	0	0.006772	0.006406	0.000592	100	98206440	0.994549	2181009	0.022087	0	0.499938	0.013294	0.000864
H3K27me3-P10POL6H	FIRST_OF_PAIR	49073838	49073838	1	0	48615418	0.990659	4786038645	46351730	4586295654	4516035530	0	0.004454	0.004103	0.000613	100	48114038	0.989687	1383795	0.028464	0	0.499807	0.013517	0.001102
H3K27me3-P10POL6H	SECOND_OF_PAIR	49073838	49073838	1	0	48155299	0.981283	4690942269	45839622	4493807144	4258183882	0	0.009154	0.008766	0.000587	100	48114038	0.999143	923676	0.019181	0	0.500042	0.014112	0.001087
H3K27me3-P10POL6H	PAIR	98147676	98147676	1	0	96770717	0.985971	9476980914	92191352	9080102798	8774219412	0	0.00678	0.006411	0.0006	100	96228076	0.994393	2307471	0.023845	0	0.499924	0.013813	0.001094
H3K27me3-P11C2H	FIRST_OF_PAIR	57712170	57712170	1	0	57379864	0.994242	5665389904	54890182	5437846711	5354215292	0	0.004319	0.004061	0.000592	100	56892068	0.991499	1409493	0.024564	0	0.499844	0.012301	0.001054
H3K27me3-P11C2H	SECOND_OF_PAIR	57712170	57712170	1	0	56933790	0.986513	5570087056	54397396	5345161182	5080135374	0	0.008672	0.008368	0.000569	100	56892068	0.999267	963419	0.016922	0	0.500036	0.012811	0.001033
H3K27me3-P11C2H	PAIR	115424340	115424340	1	0	114313654	0.990377	11235476960	109287578	10783007893	10434350666	0	0.006477	0.006196	0.000581	100	113784136	0.995368	2372912	0.020758	0	0.49994	0.012555	0.001043
H3K27me3-P11C6H	FIRST_OF_PAIR	45999832	45999832	1	0	45594979	0.991199	4491017974	43559771	4308736534	4240995635	0	0.004366	0.004076	0.000593	100	45118961	0.98956	1202621	0.026376	0	0.499706	0.013346	0.004113
H3K27me3-P11C6H	SECOND_OF_PAIR	45999832	45999832	1	0	45158683	0.981714	4400305058	43070286	4220078167	3983861164	0	0.009413	0.009079	0.000568	100	45118961	0.99912	766325	0.01697	0	0.500199	0.013926	0.004053
H3K27me3-P11C6H	PAIR	91999664	91999664	1	0	90753662	0.986456	8891323032	86630057	8528814701	8224856799	0	0.006864	0.006551	0.000581	100	90237922	0.994317	1968946	0.021695	0	0.499951	0.013634	0.004083
H3K27me3-P11LPS2H	FIRST_OF_PAIR	51140941	51140941	1	0	50410388	0.985715	4960410236	48136952	4762253792	4686620200	0	0.004297	0.004049	0.000595	100	49830389	0.988494	1517706	0.030107	0	0.499529	0.015931	0.009327
H3K27me3-P11LPS2H	SECOND_OF_PAIR	51140941	51140941	1	0	49894183	0.975621	4854916146	47559930	4658841237	4401006236	0	0.009352	0.009055	0.000571	100	49830389	0.998721	1001501	0.020073	0	0.500445	0.016546	0.008323
H3K27me3-P11LPS2H	PAIR	102281882	102281882	1	0	100304571	0.980668	9815326382	95696882	9421095029	9087626436	0	0.006797	0.006524	0.000583	100	99660778	0.993582	2519207	0.025116	0	0.499985	0.016237	0.008825
H3K27me3-P11LPS6H	FIRST_OF_PAIR	57570932	57570932	1	0	57158955	0.992844	5634111033	54671695	5409858431	5325525895	0	0.00437	0.004063	0.000601	100	56513811	0.988713	1563048	0.027346	0	0.499815	0.014031	0.001963
H3K27me3-P11LPS6H	SECOND_OF_PAIR	57570932	57570932	1	0	56558970	0.982422	5509272386	53994942	5287811408	4974003550	0	0.009785	0.009436	0.000573	100	56513811	0.999202	963063	0.017028	0	0.500059	0.014695	0.001927
H3K27me3-P11LPS6H	PAIR	115141864	115141864	1	0	113717925	0.987633	11143383419	108666637	10697669839	10299529445	0	0.007047	0.006719	0.000587	100	113027622	0.99393	2526111	0.022214	0	0.499936	0.014362	0.001945
H3K27me3-P11POL2H	FIRST_OF_PAIR	49535874	49535874	1	0	49047503	0.990141	4808121602	46845942	4612339378	4541825962	0	0.00428	0.004034	0.00059	100	48673119	0.992367	1203993	0.024547	0	0.499632	0.012767	0.005701
H3K27me3-P11POL2H	SECOND_OF_PAIR	49535874	49535874	1	0	48730109	0.983734	4737133875	46467796	4542233912	4334894897	0	0.008063	0.007774	0.000571	100	48673119	0.99883	886599	0.018194	0	0.500237	0.01325	0.005354
H3K27me3-P11POL2H	PAIR	99071748	99071748	1	0	97777612	0.986937	9545255477	93313738	9154573290	8876720859	0	0.006158	0.00589	0.000581	100	97346238	0.995588	2090592	0.021381	0	0.499934	0.013008	0.005528
H3K27me3-P11POL6H	FIRST_OF_PAIR	55015036	55015036	1	0	54624358	0.992899	5392316388	52229298	5172776665	5092138586	0	0.004339	0.00408	0.000593	100	54171284	0.991706	1473480	0.026975	0	0.499943	0.012882	0.001488
H3K27me3-P11POL6H	SECOND_OF_PAIR	55015036	55015036	1	0	54214230	0.985444	5306786941	51758842	5088519125	4849532059	0	0.008263	0.007954	0.00057	100	54171284	0.999208	1063352	0.019614	0	0.499948	0.013393	0.00142
H3K27me3-P11POL6H	PAIR	110030072	110030072	1	0	108838588	0.989171	10699103329	103988140	10261295790	9941670645	0	0.006285	0.006001	0.000582	100	108342568	0.995443	2536832	0.023308	0	0.499946	0.013137	0.001454
H3K4me3-P10C2H	FIRST_OF_PAIR	25071150	25071150	1	0	24764952	0.987787	2429811297	23683241	2336955001	2298697461	0	0.004273	0.003616	0.000543	100	24527140	0.990397	709337	0.028643	0	0.499497	0.01407	0.001051
H3K4me3-P10C2H	SECOND_OF_PAIR	25071150	25071150	1	0	24572510	0.980111	2388301254	23469251	2297785712	2185708315	0	0.008415	0.007735	0.000527	100	24527140	0.998154	516895	0.021035	0	0.499932	0.014451	0.001034
H3K4me3-P10C2H	PAIR	50142300	50142300	1	0	49337462	0.983949	4818112551	47152492	4634740713	4484405776	0	0.006326	0.005658	0.000535	100	49054280	0.99426	1226232	0.024854	0	0.499714	0.01426	0.001043
H3K4me3-P10C6H	FIRST_OF_PAIR	53616275	53616275	1	0	51580189	0.962025	5015518940	48851972	4794638997	4716178330	0	0.004487	0.003709	0.000551	100	51011497	0.988975	1557081	0.030188	0	0.499409	0.014564	0.00492
H3K4me3-P10C6H	SECOND_OF_PAIR	53616275	53616275	1	0	51141650	0.953846	4917435712	48348311	4702342152	4455683560	0	0.009081	0.008293	0.000532	100	51011497	0.997455	1118542	0.021871	0	0.500092	0.015084	0.004633
H3K4me3-P10C6H	PAIR	107232550	107232550	1	0	102721839	0.957935	9932954652	97200283	9496981149	9171861890	0	0.006761	0.005979	0.000541	100	102022994	0.993197	2675623	0.026047	0	0.499749	0.014823	0.004777
H3K4me3-P10LPS2H	FIRST_OF_PAIR	52410480	52410480	1	0	50881610	0.970829	4940637352	48471527	4754211715	4679593610	0	0.004199	0.003579	0.000541	100	50467175	0.991855	1316168	0.025867	0	0.499465	0.012613	0.00314
H3K4me3-P10LPS2H	SECOND_OF_PAIR	52410480	52410480	1	0	50584751	0.965165	4869605583	48124884	4687112490	4475062703	0	0.00791	0.007272	0.000528	100	50467175	0.997676	1019309	0.020151	0	0.499971	0.012962	0.003024
H3K4me3-P10LPS2H	PAIR	104820960	104820960	1	0	101466361	0.967997	9810242935	96596411	9441324205	9154656313	0	0.006041	0.005413	0.000534	100	100934350	0.994757	2335477	0.023017	0	0.499717	0.012787	0.003082
H3K4me3-P10LPS6H	FIRST_OF_PAIR	54832069	54832069	1	0	53737480	0.980037	5226753978	51190387	5017520287	4933946500	0	0.004339	0.003635	0.000541	100	53219498	0.990361	1426659	0.026549	0	0.499657	0.013989	0.005154
H3K4me3-P10LPS6H	SECOND_OF_PAIR	54832069	54832069	1	0	53336536	0.972725	5133820839	50731286	4930366862	4683715307	0	0.00869	0.007976	0.000525	100	53219498	0.997806	1025715	0.019231	0	0.499879	0.014357	0.005034
H3K4me3-P10LPS6H	PAIR	109664138	109664138	1	0	107074016	0.976381	10360574817	101921673	9947887149	9617661807	0	0.006495	0.005787	0.000533	100	106438996	0.994069	2452374	0.022904	0	0.499768	0.014172	0.005094
H3K4me3-P10POL2H	FIRST_OF_PAIR	46621406	46621406	1	0	45030160	0.965869	4382516138	42867007	4219085028	4150718615	0	0.004253	0.003647	0.000546	100	44581637	0.990039	1220831	0.027111	0	0.499507	0.012583	0.002858
H3K4me3-P10POL2H	SECOND_OF_PAIR	46621406	46621406	1	0	44689201	0.958555	4305970835	42481714	4146056335	3927136578	0	0.008863	0.008246	0.00053	100	44581637	0.997593	879872	0.019689	0	0.49998	0.012996	0.002776
H3K4me3-P10POL2H	PAIR	93242812	93242812	1	0	89719361	0.962212	8688486973	85348721	8365141363	8077855193	0	0.006538	0.005926	0.000538	100	89163274	0.993802	2100703	0.023414	0	0.499743	0.012789	0.002817
H3K4me3-P10POL6H	FIRST_OF_PAIR	49207644	49207644	1	0	48007119	0.975603	4697745243	45532638	4489746762	4414519361	0	0.004525	0.003705	0.000549	100	47564659	0.990783	1310871	0.027306	0	0.499413	0.013903	0.002552
H3K4me3-P10POL6H	SECOND_OF_PAIR	49207644	49207644	1	0	47671140	0.968775	4618965785	45154746	4417135850	4195670939	0	0.008821	0.007991	0.000531	100	47564659	0.997766	974892	0.02045	0	0.500079	0.014241	0.002482
H3K4me3-P10POL6H	PAIR	98415288	98415288	1	0	95678259	0.972189	9316711028	90687384	8906882612	8610190300	0	0.006655	0.005831	0.00054	100	95129318	0.994263	2285763	0.02389	0	0.499745	0.014072	0.002517
H3K4me3-P11C2H	FIRST_OF_PAIR	54647955	54647955	1	0	54049115	0.989042	5297590218	51585601	5086485617	5000874742	0	0.004347	0.00365	0.00055	100	53551940	0.990801	1417420	0.026225	0	0.499438	0.014177	0.001623
H3K4me3-P11C2H	SECOND_OF_PAIR	54647955	54647955	1	0	53671524	0.982132	5210356029	51163095	5004950700	4754378259	0	0.008623	0.007919	0.000535	100	53551940	0.997772	1039829	0.019374	0	0.499976	0.014461	0.001565
H3K4me3-P11C2H	PAIR	109295910	109295910	1	0	107720639	0.985587	10507946247	102748696	10091436317	9755253001	0	0.006467	0.005767	0.000542	100	107103880	0.994274	2457249	0.022811	0	0.499706	0.014318	0.001594
H3K4me3-P11C6H	FIRST_OF_PAIR	53522811	53522811	1	0	51554482	0.963224	5007917120	48952191	4815307587	4734533186	0	0.004313	0.003694	0.000554	100	51012392	0.989485	1403759	0.027229	0	0.499387	0.014373	0.006749
H3K4me3-P11C6H	SECOND_OF_PAIR	53522811	53522811	1	0	51186022	0.95634	4922234302	48529761	4733789225	4494785873	0	0.008651	0.008031	0.000537	100	51012392	0.996608	1035299	0.020226	0	0.500094	0.014723	0.006536
H3K4me3-P11C6H	PAIR	107045622	107045622	1	0	102740504	0.959782	9930151422	97481952	9549096812	9229319059	0	0.006463	0.005844	0.000546	100	102024784	0.993034	2439058	0.02374	0	0.499739	0.014547	0.006642
H3K4me3-P11LPS2H	FIRST_OF_PAIR	42918566	42918566	1	0	42325651	0.986185	4148905588	40756752	4020968606	3950504312	0	0.004064	0.003615	0.000544	100	41842509	0.988585	1097696	0.025935	0	0.499539	0.012877	0.001905
H3K4me3-P11LPS2H	SECOND_OF_PAIR	42918566	42918566	1	0	41937303	0.977137	4066631461	40321584	3940785190	3723342539	0	0.009019	0.008549	0.000528	100	41842509	0.99774	709348	0.016914	0	0.499884	0.013243	0.001863
H3K4me3-P11LPS2H	PAIR	85837132	85837132	1	0	84262954	0.981661	8215537049	81078336	7961753796	7673846851	0	0.006516	0.006057	0.000536	100	83685018	0.993141	1807044	0.021445	0	0.499711	0.013059	0.001884
H3K4me3-P11LPS6H	FIRST_OF_PAIR	45558576	45558576	1	0	44011555	0.966043	4274405970	41444112	4076450585	4007661647	0	0.0046	0.003779	0.000558	100	43554441	0.989614	1281584	0.029119	0	0.499303	0.014892	0.008984
H3K4me3-P11LPS6H	SECOND_OF_PAIR	45558576	45558576	1	0	43692635	0.959043	4199815803	41077332	4007205029	3805398208	0	0.008919	0.008102	0.000541	100	43554441	0.996837	962664	0.022033	0	0.500185	0.015241	0.008696
H3K4me3-P11LPS6H	PAIR	91117152	91117152	1	0	87704190	0.962543	8474221773	82521444	8083655614	7813059855	0	0.006741	0.005922	0.00055	100	87108882	0.993212	2244248	0.025589	0	0.499743	0.015066	0.00884
H3K4me3-P11POL2H	FIRST_OF_PAIR	48432233	48432233	1	0	47879456	0.988587	4692159904	45830611	4518228068	4443836503	0	0.00425	0.003636	0.000551	100	47497999	0.992033	1166031	0.024353	0	0.49943	0.013356	0.001684
H3K4me3-P11POL2H	SECOND_OF_PAIR	48432233	48432233	1	0	47599479	0.982806	4625942497	45512288	4455759204	4253461458	0	0.008	0.007373	0.000536	100	47497999	0.997868	886054	0.018615	0	0.499971	0.013622	0.001637
H3K4me3-P11POL2H	PAIR	96864466	96864466	1	0	95478935	0.985696	9318102401	91342899	8973987272	8697297961	0	0.006111	0.005491	0.000544	100	94995998	0.994942	2052085	0.021493	0	0.4997	0.013489	0.001661
H3K4me3-P11POL6H	FIRST_OF_PAIR	60640243	60640243	1	0	58721963	0.968366	5658159773	55442183	5437888755	5348274299	0	0.004316	0.003716	0.000555	100	58226904	0.991569	1503160	0.025598	0	0.499388	0.013271	0.003653
H3K4me3-P11POL6H	SECOND_OF_PAIR	60640243	60640243	1	0	58421413	0.96341	5585522225	55090512	5368767750	5134837276	0	0.0078	0.007199	0.00054	100	58226904	0.996671	1202610	0.020585	0	0.500003	0.013549	0.003369
H3K4me3-P11POL6H	PAIR	121280486	121280486	1	0	117143376	0.965888	11243681998	110532695	10806656505	10483111575	0	0.006047	0.005446	0.000547	100	116453808	0.994113	2705770	0.023098	0	0.499694	0.013409	0.003511
I-P10C2H	FIRST_OF_PAIR	72974683	72974683	1	0	72677286	0.995925	6966537569	67750896	6534769232	6435192631	0	0.005293	0.00431	0.000595	100	72474171	0.997205	1283926	0.017666	0	0.499932	0.012194	0.000635
I-P10C2H	SECOND_OF_PAIR	72974683	72974683	1	0	72523772	0.993821	6918439241	67557988	6489974795	6300316906	0	0.007167	0.006185	0.000581	100	72474171	0.999316	1130412	0.015587	0	0.499922	0.012521	0.000586
I-P10C2H	PAIR	145949366	145949366	1	0	145201058	0.994873	13884976810	135308884	13024744027	12735509537	0	0.006227	0.005244	0.000588	100	144948342	0.99826	2414338	0.016628	0	0.499927	0.012357	0.00061
I-P10C6H	FIRST_OF_PAIR	47797143	47797143	1	0	47585746	0.995577	4574788487	44337202	4289855200	4221947536	0	0.005362	0.004352	0.000603	100	47407643	0.996257	937656	0.019705	0	0.499863	0.012976	0.00035
I-P10C6H	SECOND_OF_PAIR	47797143	47797143	1	0	47438770	0.992502	4534733746	44153695	4251699031	4112874611	0	0.007579	0.006571	0.000587	100	47407643	0.999344	790680	0.016667	0	0.499982	0.013345	0.000329
I-P10C6H	PAIR	95594286	95594286	1	0	95024516	0.99404	9109522233	88490897	8541554231	8334822147	0	0.006465	0.005456	0.000595	100	94815286	0.997798	1728336	0.018188	0	0.499922	0.01316	0.000339
I-P10LPS2H	FIRST_OF_PAIR	58344088	58344088	1	0	58098536	0.995791	5576122283	54226357	5236673155	5155206560	0	0.005287	0.004312	0.000602	100	57929103	0.997084	1050301	0.018078	0	0.499831	0.012292	0.000519
I-P10LPS2H	SECOND_OF_PAIR	58344088	58344088	1	0	57968094	0.993556	5536825204	54067989	5200072156	5040678875	0	0.007287	0.006315	0.000588	100	57929103	0.999327	919859	0.015868	0	0.50001	0.012598	0.000489
I-P10LPS2H	PAIR	116688176	116688176	1	0	116066630	0.994673	11112947487	108294346	10436745311	10195885435	0	0.006283	0.00531	0.000595	100	115858206	0.998204	1970160	0.016974	0	0.49992	0.012445	0.000504
I-P10LPS6H	FIRST_OF_PAIR	68651706	68651706	1	0	68326131	0.995258	6551393445	63624566	6140824252	6044720846	0	0.005364	0.004344	0.000599	100	68074430	0.996316	1325009	0.019392	0	0.499881	0.012744	0.000542
I-P10LPS6H	SECOND_OF_PAIR	68651706	68651706	1	0	68122991	0.992299	6496175991	63381632	6089351619	5892089396	0	0.007574	0.00656	0.000584	100	68074430	0.999287	1121869	0.016468	0	0.499973	0.013049	0.00051
I-P10LPS6H	PAIR	137303412	137303412	1	0	136449122	0.993778	13047569436	127006198	12230175871	11936810242	0	0.006464	0.005447	0.000591	100	136148860	0.997799	2446878	0.017933	0	0.499927	0.012896	0.000526
I-P10POL2H	FIRST_OF_PAIR	41737173	41737173	1	0	41567853	0.995943	4020864051	38868170	3781752031	3720742079	0	0.005291	0.004317	0.000602	100	41396985	0.995889	841299	0.020239	0	0.499817	0.013405	0.000406
I-P10POL2H	SECOND_OF_PAIR	41737173	41737173	1	0	41424575	0.99251	3981642185	38691612	3744683557	3608692825	0	0.007844	0.006873	0.000588	100	41396985	0.999334	698021	0.01685	0	0.500013	0.0138	0.000382
I-P10POL2H	PAIR	83474346	83474346	1	0	82992428	0.994227	8002506236	77559782	7526435588	7329434904	0	0.006561	0.005588	0.000595	100	82793970	0.997609	1539320	0.018548	0	0.499914	0.013602	0.000394
I-P10POL6H	FIRST_OF_PAIR	54421805	54421805	1	0	54140549	0.994832	5218030519	50390040	4888627234	4812241730	0	0.005404	0.00436	0.000601	100	53966393	0.996783	1001348	0.018495	0	0.499829	0.013345	0.000656
I-P10POL6H	SECOND_OF_PAIR	54421805	54421805	1	0	54008527	0.992406	5177485497	50228540	4851308708	4695189085	0	0.00753	0.006494	0.000586	100	53966393	0.99922	869326	0.016096	0	0.500013	0.013643	0.000609
I-P10POL6H	PAIR	108843610	108843610	1	0	108149076	0.993619	10395516016	100618580	9739935942	9507430815	0	0.006462	0.005423	0.000594	100	107932786	0.998	1870674	0.017297	0	0.499921	0.013494	0.000633
I-P11C2H	FIRST_OF_PAIR	70579394	70579394	1	0	70181957	0.994369	6676550075	65007772	6229269880	6136160559	0	0.005417	0.004373	0.000585	100	70003939	0.997463	1167220	0.016631	0	0.499964	0.012184	0.001296
I-P11C2H	SECOND_OF_PAIR	70579394	70579394	1	0	70066562	0.992734	6637639580	64863134	6193807753	6023459308	0	0.00711	0.006074	0.000572	100	70003939	0.999106	1051825	0.015012	0	0.499875	0.012454	0.001191
I-P11C2H	PAIR	141158788	141158788	1	0	140248519	0.993551	13314189655	129870906	12423077633	12159619867	0	0.006261	0.005221	0.000579	100	140007878	0.998284	2219045	0.015822	0	0.499919	0.012319	0.001243
I-P11C6H	FIRST_OF_PAIR	59951672	59951672	1	0	59656479	0.995076	5810443243	55578295	5446058884	5367939320	0	0.005363	0.004321	0.000612	100	59351187	0.994883	1348189	0.022599	0	0.499934	0.014446	0.00043
I-P11C6H	SECOND_OF_PAIR	59951672	59951672	1	0	59399168	0.990784	5737973820	55264400	5377698181	5156103059	0	0.008662	0.007629	0.00059	100	59351187	0.999192	1090878	0.018365	0	0.49988	0.015293	0.000424
I-P11C6H	PAIR	119903344	119903344	1	0	119055647	0.99293	11548417063	110842695	10823757065	10524042379	0	0.007002	0.005965	0.000601	100	118702374	0.997033	2439067	0.020487	0	0.499907	0.014869	0.000427
I-P11LPS2H	FIRST_OF_PAIR	64932601	64932601	1	0	63646108	0.980187	5983414354	57747637	5566665358	5479162868	0	0.005422	0.004387	0.00059	100	63420852	0.996461	1147178	0.018024	0	0.499823	0.012819	0.001063
I-P11LPS2H	SECOND_OF_PAIR	64932601	64932601	1	0	63484583	0.9777	5936136497	57549579	5523134407	5343347861	0	0.007574	0.006559	0.000577	100	63420852	0.998996	985653	0.015526	0	0.50004	0.013095	0.000979
I-P11LPS2H	PAIR	129865202	129865202	1	0	127130691	0.978943	11919550851	115297216	11089799765	10822510729	0	0.006493	0.005468	0.000583	100	126841704	0.997727	2132831	0.016777	0	0.499931	0.012957	0.001021
I-P11LPS6H	FIRST_OF_PAIR	65580744	65580744	1	0	65245457	0.994887	6325139536	60954086	5945292085	5860707505	0	0.005228	0.004255	0.000616	100	64926445	0.995111	1440546	0.022079	0	0.49987	0.014219	0.000852
I-P11LPS6H	SECOND_OF_PAIR	65580744	65580744	1	0	64977881	0.990807	6246564238	60614533	5870450146	5633351982	0	0.008449	0.007484	0.000593	100	64926445	0.999208	1172970	0.018052	0	0.499938	0.015129	0.000825
I-P11LPS6H	PAIR	131161488	131161488	1	0	130223338	0.992847	12571703774	121568619	11815742231	11494059487	0	0.006829	0.005859	0.000604	100	129852890	0.997155	2613516	0.020069	0	0.499904	0.014673	0.000838
I-P11POL2H	FIRST_OF_PAIR	64707568	64707568	1	0	64430278	0.995715	6224966605	59773908	5812289859	5732484975	0	0.005415	0.004348	0.000604	100	64209222	0.996569	1269486	0.019703	0	0.499817	0.013578	0.000262
I-P11POL2H	SECOND_OF_PAIR	64707568	64707568	1	0	64259094	0.993069	6169343797	59552171	5759838779	5568454526	0	0.007824	0.006764	0.000587	100	64209222	0.999224	1098302	0.017092	0	0.500002	0.014374	0.000257
I-P11POL2H	PAIR	129415136	129415136	1	0	128689372	0.994392	12394310402	119326079	11572128638	11300939501	0	0.006614	0.00555	0.000595	100	128418444	0.997895	2367788	0.018399	0	0.49991	0.013976	0.00026
I-P11POL6H	FIRST_OF_PAIR	69676485	69676485	1	0	69344441	0.995234	6680829014	64415870	6247568484	6160150632	0	0.005364	0.004323	0.000609	100	69068007	0.996014	1430505	0.020629	0	0.499913	0.013855	0.00033
I-P11POL6H	SECOND_OF_PAIR	69676485	69676485	1	0	69120918	0.992026	6613337890	64123588	6182851854	5966496896	0	0.007989	0.006955	0.000589	100	69068007	0.999235	1206982	0.017462	0	0.499903	0.014679	0.000321
I-P11POL6H	PAIR	139352970	139352970	1	0	138465359	0.99363	13294166904	128539458	12430420338	12126647528	0	0.00667	0.005632	0.000599	100	138136014	0.997621	2637487	0.019048	0	0.499908	0.014266	0.000325

## Sheet: Summary - Mapping stats
Supplementary file S6. Summary of ChIP-seq reads - mapping stats of alveolar macrophages stimulated with LPS and Poly(I:C).
SAMPLE	CATEGORY	TOTAL_READS	PF_READS	PCT_PF_READS	PF_NOISE_READS	PF_READS_ALIGNED	PCT_PF_READS_ALIGNED	PF_ALIGNED_BASES	PF_HQ_ALIGNED_READS	PF_HQ_ALIGNED_BASES	PF_HQ_ALIGNED_Q20_BASES	PF_HQ_MEDIAN_MISMATCHES	PF_MISMATCH_RATE	PF_HQ_ERROR_RATE	PF_INDEL_RATE	MEAN_READ_LENGTH	READS_ALIGNED_IN_PAIRS	PCT_READS_ALIGNED_IN_PAIRS	PF_READS_IMPROPER_PAIRS	PCT_PF_READS_IMPROPER_PAIRS	BAD_CYCLES	STRAND_BALANCE	PCT_CHIMERAS	PCT_ADAPTER
H3K27ac-P7C2H	PAIR	25632257	25632257	1	0	21468088	0.837542	2093501597	19707284	1948881753	1921950029	0	0.005294	0.004176	0.000623	99.8914	21389726	0.99635	1255240	0.05847	0	0.499537	0.04445	1.1e-05
H3K27ac-P7C6H	PAIR	76827546	76827546	1	0	74965735	0.975766	7386146419	71712063	7100496855	6901675605	0	0.006078	0.005474	0.000606	99.9608	74717810	0.996693	2675241	0.035686	0	0.499826	0.028285	2e-06
H3K27ac-P7LPS2H	PAIR	29156131	29156131	1	0	24510919	0.840678	2395617833	22625156	2238356362	2206779962	0	0.005278	0.004232	0.00063	99.9039	24421542	0.996354	1437351	0.058641	0	0.499503	0.04075	1.9e-05
H3K27ac-P7LPS6H	PAIR	45600178	45600178	1	0	44124912	0.967648	4346310465	42351052	4192324108	4067080693	0	0.006166	0.005608	0.000605	99.961	43959150	0.996243	1492390	0.033822	0	0.499818	0.027788	3e-06
H3K27ac-P7POL2H	PAIR	26113470	26113470	1	0	18499143	0.708414	1784121589	16321439	1609494374	1586465187	0	0.005914	0.004374	0.000665	99.8684	18418448	0.995638	1680679	0.090852	0	0.499031	0.071535	1.6e-05
H3K27ac-P7POL6H	PAIR	24878604	24878604	1	0	21183072	0.851457	2059268507	19437752	1919006697	1883877383	0	0.005936	0.004799	0.000636	99.8978	21035002	0.99301	1303040	0.061513	0	0.49959	0.040522	7e-06
H3K27ac-P8C2H	PAIR	42256307	42256307	1	0	40522194	0.958962	3993745855	39031441	3865019731	3759881026	0	0.005808	0.005311	0.000585	99.9614	40329536	0.995246	1558268	0.038455	0	0.499843	0.024454	1e-05
H3K27ac-P8C6H	PAIR	23449711	23449711	1	0	16019688	0.683151	1551699490	14314860	1413371981	1394422732	0	0.005554	0.004174	0.000638	99.8409	15957042	0.996089	1492440	0.093163	0	0.498933	0.073455	0.00012
H3K27ac-P8LPS2H	PAIR	35661060	35661060	1	0	29607417	0.830245	2884412454	27639673	2729960723	2689327513	0	0.005129	0.004304	0.000618	99.9169	29445972	0.994547	1680423	0.056757	0	0.499584	0.037571	1.4e-05
H3K27ac-P8LPS6H	PAIR	16211056	16211056	1	0	10649687	0.65694	1036289597	9804809	968274515	956214489	0	0.005219	0.004167	0.000634	99.9227	10598734	0.995216	586129	0.055037	0	0.499553	0.040171	8.3e-05
H3K27ac-P8POL2H	PAIR	54753723	54753723	1	0	52386078	0.956758	5158567012	50391783	4987733560	4848909282	0	0.0059	0.005379	0.000607	99.956	52157362	0.995634	2187782	0.041763	0	0.499822	0.029497	4e-06
H3K27ac-P8POL6H	PAIR	75058194	75058194	1	0	70284442	0.936399	6910843425	67240811	6653635592	6486054495	0	0.005802	0.005197	0.000608	99.9604	70011516	0.996117	2684776	0.038199	0	0.499809	0.028041	5e-06
Average		3.96332e+07	3.96332e+07	1	0	3.53518e+07	0.85033	3.46671e+09	3.33815e+07	3.30221e+09	3.22522e+09	0	0.00567317	0.00476625	0.00062125	99.9201	3.52035e+07	0.995595	1.66948e+06	0.0551965	0	0.499571	0.0405432	2.45e-05
H3K4me1-P7C2H	PAIR	31859621	31859621	1	0	30401569	0.954235	2992158912	29410042	2911673108	2840043740	0	0.005468	0.005123	0.000602	99.9639	30267934	0.995604	1041121	0.034246	0	0.499744	0.023475	3e-06
H3K4me1-P7C6H	PAIR	31050293	31050293	1	0	30082740	0.968839	2958907024	29104490	2879445028	2794570888	0	0.005963	0.005614	0.000597	99.9657	29925710	0.99478	1000924	0.033272	0	0.499791	0.022886	3e-06
H3K4me1-P7LPS2H	PAIR	32988487	32988487	1	0	31855778	0.965664	3136952280	30781718	3047783900	2966465422	0	0.005719	0.00533	0.0006	99.9628	31703472	0.995219	1082674	0.033987	0	0.499744	0.02276	3e-06
H3K4me1-P7LPS6H	PAIR	32707787	32707787	1	0	30860316	0.943516	3033534865	29651503	2935167650	2871967176	0	0.005199	0.004808	0.000614	99.9554	30760908	0.996779	1192210	0.038632	0	0.49963	0.029801	8e-06
H3K4me1-P7POL2H	PAIR	33663226	33663226	1	0	32401719	0.962526	3189593387	31298414	3098318038	3015106288	0	0.005717	0.005335	0.0006	99.9695	32255288	0.995481	1107225	0.034172	0	0.49975	0.023556	9e-06
H3K4me1-P7POL6H	PAIR	26347345	26347345	1	0	25316505	0.960875	2487812942	24353667	2408240412	2332863017	0	0.006361	0.005897	0.000602	99.9608	25149616	0.993408	1038859	0.041035	0	0.499794	0.029271	5e-06
H3K4me1-P8C2H	PAIR	21445883	21445883	1	0	20686265	0.96458	2032108333	19822286	1959926833	1895989422	0	0.006561	0.006008	0.000599	99.9541	20528944	0.992395	892273	0.043134	0	0.499769	0.026651	2.3e-05
H3K4me1-P8C6H	PAIR	26957893	26957893	1	0	25935518	0.962075	2549266386	24974691	2470211523	2394958502	0	0.006153	0.005711	0.000597	99.9619	25783290	0.994131	1007890	0.038861	0	0.499804	0.025446	7e-05
H3K4me1-P8LPS2H	PAIR	44778820	44778820	1	0	43448074	0.970282	4274726119	41981228	4152901669	4021719474	0	0.006217	0.005815	0.000593	99.9626	43178684	0.9938	1628064	0.037471	0	0.499815	0.024636	5e-06
H3K4me1-P8LPS6H	PAIR	39081532	39081532	1	0	31634359	0.809445	3071422336	29757247	2932954213	2869848939	0	0.005772	0.00511	0.000631	99.9454	31350388	0.991023	1829153	0.057822	0	0.499601	0.037111	1e-05
H3K4me1-P8POL2H	PAIR	41097515	41097515	1	0	39503343	0.96121	3887452171	37885328	3750839452	3655198434	0	0.005793	0.00528	0.000603	99.9561	39302192	0.994908	1631141	0.041291	0	0.499782	0.026568	6e-06
H3K4me1-P8POL6H	PAIR	35129761	35129761	1	0	32566392	0.927031	3191536365	30977512	3063883044	3000264233	0	0.005389	0.004861	0.000615	99.9421	32419082	0.995477	1705672	0.052375	0	0.499599	0.036085	6e-06
Average		3.30923e+07	3.30923e+07	1	0	3.12244e+07	0.945856	3.06712e+09	2.99998e+07	2.96761e+09	2.88825e+09	0	0.00585933	0.00540767	0.000604417	99.9584	3.10521e+07	0.994417	1.2631e+06	0.0405248	0	0.499735	0.0273538	1.25833e-05
H3K27me3-P10C2H	PAIR	110330174	110330174	1	0	109227885	0.990009	10696872624	104202453	10248842387	9922984968	0	0.006539	0.006181	0.000592	100	108719550	0.995346	2328299	0.021316	0	0.499936	0.013065	0.000926
H3K27me3-P10C6H	PAIR	117219974	117219974	1	0	115415598	0.984607	11282417214	109914606	10806433769	10432098238	0	0.006932	0.006562	0.000601	100	114648674	0.993355	2920162	0.025301	0	0.499939	0.013854	0.001043
H3K27me3-P10LPS2H	PAIR	114004536	114004536	1	0	112677517	0.98836	11000742152	107171168	10516548508	10182756938	0	0.006622	0.006216	0.000597	100	112106902	0.994936	2717119	0.024114	0	0.499923	0.013127	0.001677
H3K27me3-P10LPS6H	PAIR	107303614	107303614	1	0	105881577	0.986748	10372564485	100957132	9940102165	9582649907	0	0.007095	0.006707	0.000597	100	105139994	0.992996	2611255	0.024662	0	0.499934	0.013953	0.000754
H3K27me3-P10POL2H	PAIR	99748420	99748420	1	0	98744675	0.989937	9682233944	94253113	9280473720	8967214610	0	0.006772	0.006406	0.000592	100	98206440	0.994549	2181009	0.022087	0	0.499938	0.013294	0.000864
H3K27me3-P10POL6H	PAIR	98147676	98147676	1	0	96770717	0.985971	9476980914	92191352	9080102798	8774219412	0	0.00678	0.006411	0.0006	100	96228076	0.994393	2307471	0.023845	0	0.499924	0.013813	0.001094
H3K27me3-P11C2H	PAIR	115424340	115424340	1	0	114313654	0.990377	11235476960	109287578	10783007893	10434350666	0	0.006477	0.006196	0.000581	100	113784136	0.995368	2372912	0.020758	0	0.49994	0.012555	0.001043
H3K27me3-P11C6H	PAIR	91999664	91999664	1	0	90753662	0.986456	8891323032	86630057	8528814701	8224856799	0	0.006864	0.006551	0.000581	100	90237922	0.994317	1968946	0.021695	0	0.499951	0.013634	0.004083
H3K27me3-P11LPS2H	PAIR	102281882	102281882	1	0	100304571	0.980668	9815326382	95696882	9421095029	9087626436	0	0.006797	0.006524	0.000583	100	99660778	0.993582	2519207	0.025116	0	0.499985	0.016237	0.008825
H3K27me3-P11LPS6H	PAIR	115141864	115141864	1	0	113717925	0.987633	11143383419	108666637	10697669839	10299529445	0	0.007047	0.006719	0.000587	100	113027622	0.99393	2526111	0.022214	0	0.499936	0.014362	0.001945
H3K27me3-P11POL2H	PAIR	99071748	99071748	1	0	97777612	0.986937	9545255477	93313738	9154573290	8876720859	0	0.006158	0.00589	0.000581	100	97346238	0.995588	2090592	0.021381	0	0.499934	0.013008	0.005528
H3K27me3-P11POL6H	PAIR	110030072	110030072	1	0	108838588	0.989171	10699103329	103988140	10261295790	9941670645	0	0.006285	0.006001	0.000582	100	108342568	0.995443	2536832	0.023308	0	0.499946	0.013137	0.001454
Average		1.06725e+08	1.06725e+08	1	0	1.05369e+08	0.987239	1.03201e+10	100522738	9.89325e+09	9.56056e+09	0	0.00669733	0.00636367	0.0005895	100	1.04787e+08	0.994484	2.42333e+06	0.0229831	0	0.49994	0.0136699	0.00243633
H3K4me3-P10C2H	PAIR	50142300	50142300	1	0	49337462	0.983949	4818112551	47152492	4634740713	4484405776	0	0.006326	0.005658	0.000535	100	49054280	0.99426	1226232	0.024854	0	0.499714	0.01426	0.001043
H3K4me3-P10C6H	PAIR	107232550	107232550	1	0	102721839	0.957935	9932954652	97200283	9496981149	9171861890	0	0.006761	0.005979	0.000541	100	102022994	0.993197	2675623	0.026047	0	0.499749	0.014823	0.004777
H3K4me3-P10LPS2H	PAIR	104820960	104820960	1	0	101466361	0.967997	9810242935	96596411	9441324205	9154656313	0	0.006041	0.005413	0.000534	100	100934350	0.994757	2335477	0.023017	0	0.499717	0.012787	0.003082
H3K4me3-P10LPS6H	PAIR	109664138	109664138	1	0	107074016	0.976381	10360574817	101921673	9947887149	9617661807	0	0.006495	0.005787	0.000533	100	106438996	0.994069	2452374	0.022904	0	0.499768	0.014172	0.005094
H3K4me3-P10POL2H	PAIR	93242812	93242812	1	0	89719361	0.962212	8688486973	85348721	8365141363	8077855193	0	0.006538	0.005926	0.000538	100	89163274	0.993802	2100703	0.023414	0	0.499743	0.012789	0.002817
H3K4me3-P10POL6H	PAIR	98415288	98415288	1	0	95678259	0.972189	9316711028	90687384	8906882612	8610190300	0	0.006655	0.005831	0.00054	100	95129318	0.994263	2285763	0.02389	0	0.499745	0.014072	0.002517
H3K4me3-P11C2H	PAIR	109295910	109295910	1	0	107720639	0.985587	10507946247	102748696	10091436317	9755253001	0	0.006467	0.005767	0.000542	100	107103880	0.994274	2457249	0.022811	0	0.499706	0.014318	0.001594
H3K4me3-P11C6H	PAIR	107045622	107045622	1	0	102740504	0.959782	9930151422	97481952	9549096812	9229319059	0	0.006463	0.005844	0.000546	100	102024784	0.993034	2439058	0.02374	0	0.499739	0.014547	0.006642
H3K4me3-P11LPS2H	PAIR	85837132	85837132	1	0	84262954	0.981661	8215537049	81078336	7961753796	7673846851	0	0.006516	0.006057	0.000536	100	83685018	0.993141	1807044	0.021445	0	0.499711	0.013059	0.001884
H3K4me3-P11LPS6H	PAIR	91117152	91117152	1	0	87704190	0.962543	8474221773	82521444	8083655614	7813059855	0	0.006741	0.005922	0.00055	100	87108882	0.993212	2244248	0.025589	0	0.499743	0.015066	0.00884
H3K4me3-P11POL2H	PAIR	96864466	96864466	1	0	95478935	0.985696	9318102401	91342899	8973987272	8697297961	0	0.006111	0.005491	0.000544	100	94995998	0.994942	2052085	0.021493	0	0.4997	0.013489	0.001661
H3K4me3-P11POL6H	PAIR	121280486	121280486	1	0	117143376	0.965888	11243681998	110532695	10806656505	10483111575	0	0.006047	0.005446	0.000547	100	116453808	0.994113	2705770	0.023098	0	0.499694	0.013409	0.003511
Average		9.79132e+07	9.79132e+07	1	0	9.50873e+07	0.971818	9.21806e+09	9.03844e+07	8.85496e+09	8.56404e+09	0	0.00643008	0.00576008	0.0005405	100	9.45096e+07	0.993922	2.2318e+06	0.0235252	0	0.499727	0.0138993	0.00362183
I-P7C2H	PAIR	188164557	188164557	1	0	186953777	0.993565	18400710003	174543428	17284375392	16853837439	0	0.00646	0.005461	0.000675	99.9664	186484284	0.997489	7321679	0.039163	0	0.499836	0.029925	1e-06
I-P7C6H	PAIR	152883031	152883031	1	0	151678201	0.992119	14918775642	141369136	13994522155	13615288528	0	0.006787	0.005733	0.000671	99.9603	151182056	0.996729	5864067	0.038661	0	0.499829	0.030712	1e-06
I-P7LPS2H	PAIR	209457672	209457672	1	0	208032986	0.993198	20482525384	194380335	19252382496	18790396837	0	0.00634	0.005351	0.000677	99.9643	207572358	0.997786	7895878	0.037955	0	0.499829	0.028955	1e-06
I-P7LPS6H	PAIR	222940689	222940689	1	0	221237290	0.992359	21761280186	205288915	20326904452	19785175806	0	0.006762	0.005646	0.000675	99.9681	220552782	0.996906	12920910	0.058403	0	0.499819	0.051101	2e-06
I-P7POL2H	PAIR	210107306	210107306	1	0	208730081	0.993445	20535005371	194558215	19260538343	18745823809	0	0.006683	0.005647	0.000681	99.9667	208197954	0.997451	8112517	0.038866	0	0.499816	0.029816	1e-06
I-P7POL6H	PAIR	195552752	195552752	1	0	194187392	0.993018	19112589395	181135669	17939230897	17467191087	0	0.006596	0.005568	0.000669	99.9644	193627888	0.997119	8639688	0.044491	0	0.499821	0.035711	1e-06
I-P8C2H	PAIR	188072030	188072030	1	0	186690518	0.992654	18381663947	174480986	17281991288	16852931885	0	0.006619	0.005595	0.000675	99.9667	186168584	0.997204	7989614	0.042796	0	0.499852	0.032866	1e-06
I-P8C6H	PAIR	175703613	175703613	1	0	174320034	0.992125	17157534987	161782170	16024848742	15649533256	0	0.00658	0.005439	0.000685	99.9705	173875942	0.997452	10699584	0.061379	0	0.499833	0.052608	1e-06
I-P8LPS2H	PAIR	245307076	245307076	1	0	243454502	0.992448	23967080850	226948839	22479028382	21922016815	0	0.006618	0.005557	0.000672	99.9624	242770484	0.99719	11279216	0.04633	0	0.499856	0.035881	1e-05
I-P8LPS6H	PAIR	154959068	154959068	1	0	153678207	0.991734	15109739320	142414716	14097125802	13747342821	0	0.006849	0.00565	0.000697	99.9677	153275220	0.997378	6186341	0.040255	0	0.499813	0.033365	1e-06
I-P8POL2H	PAIR	182472292	182472292	1	0	181157653	0.992795	17831277909	168738929	16710869511	16306806737	0	0.006546	0.005477	0.000682	99.9653	180693878	0.99744	9193251	0.050747	0	0.499834	0.041124	1e-06
I-P8POL6H	PAIR	159626081	159626081	1	0	158294749	0.99166	15576613931	147126158	14570467611	14218554777	0	0.006679	0.005547	0.000681	99.9648	157917160	0.997615	5303381	0.033503	0	0.499845	0.024829	1e-06
Average		1.90437e+08	1.90437e+08	1	0	1.89035e+08	0.992593	1.86029e+10	176063958	1.74352e+10	1.69962e+10	0	0.00662658	0.00555592	0.000678333	99.9656	1.88527e+08	0.997313	8.45051e+06	0.0443791	0	0.499832	0.0355744	1.83333e-06
I-P10C2H	PAIR	145949366	145949366	1	0	145201058	0.994873	13884976810	135308884	13024744027	12735509537	0	0.006227	0.005244	0.000588	100	144948342	0.99826	2414338	0.016628	0	0.499927	0.012357	0.00061
I-P10C6H	PAIR	95594286	95594286	1	0	95024516	0.99404	9109522233	88490897	8541554231	8334822147	0	0.006465	0.005456	0.000595	100	94815286	0.997798	1728336	0.018188	0	0.499922	0.01316	0.000339
I-P10LPS2H	PAIR	116688176	116688176	1	0	116066630	0.994673	11112947487	108294346	10436745311	10195885435	0	0.006283	0.00531	0.000595	100	115858206	0.998204	1970160	0.016974	0	0.49992	0.012445	0.000504
I-P10LPS6H	PAIR	137303412	137303412	1	0	136449122	0.993778	13047569436	127006198	12230175871	11936810242	0	0.006464	0.005447	0.000591	100	136148860	0.997799	2446878	0.017933	0	0.499927	0.012896	0.000526
I-P10POL2H	PAIR	83474346	83474346	1	0	82992428	0.994227	8002506236	77559782	7526435588	7329434904	0	0.006561	0.005588	0.000595	100	82793970	0.997609	1539320	0.018548	0	0.499914	0.013602	0.000394
I-P10POL6H	PAIR	108843610	108843610	1	0	108149076	0.993619	10395516016	100618580	9739935942	9507430815	0	0.006462	0.005423	0.000594	100	107932786	0.998	1870674	0.017297	0	0.499921	0.013494	0.000633
I-P11C2H	PAIR	141158788	141158788	1	0	140248519	0.993551	13314189655	129870906	12423077633	12159619867	0	0.006261	0.005221	0.000579	100	140007878	0.998284	2219045	0.015822	0	0.499919	0.012319	0.001243
I-P11C6H	PAIR	119903344	119903344	1	0	119055647	0.99293	11548417063	110842695	10823757065	10524042379	0	0.007002	0.005965	0.000601	100	118702374	0.997033	2439067	0.020487	0	0.499907	0.014869	0.000427
I-P11LPS2H	PAIR	129865202	129865202	1	0	127130691	0.978943	11919550851	115297216	11089799765	10822510729	0	0.006493	0.005468	0.000583	100	126841704	0.997727	2132831	0.016777	0	0.499931	0.012957	0.001021
I-P11LPS6H	PAIR	131161488	131161488	1	0	130223338	0.992847	12571703774	121568619	11815742231	11494059487	0	0.006829	0.005859	0.000604	100	129852890	0.997155	2613516	0.020069	0	0.499904	0.014673	0.000838
I-P11POL2H	PAIR	129415136	129415136	1	0	128689372	0.994392	12394310402	119326079	11572128638	11300939501	0	0.006614	0.00555	0.000595	100	128418444	0.997895	2367788	0.018399	0	0.49991	0.013976	0.00026
I-P11POL6H	PAIR	139352970	139352970	1	0	138465359	0.99363	13294166904	128539458	12430420338	12126647528	0	0.00667	0.005632	0.000599	100	138136014	0.997621	2637487	0.019048	0	0.499908	0.014266	0.000325
Average		1.23226e+08	1.23226e+08	1	0	1.22308e+08	0.992625	1.17163e+10	113560305	10971209720	1.07056e+10	0	0.00652758	0.00551358	0.00059325	100	1.22038e+08	0.997782	2.19829e+06	0.0180142	0	0.499918	0.0134178	0.000593333
